# Supplementary material for: Transoral Atlantoaxial Reduction Plate (TARP) Technique for the Treatment of Irreducible Atlantoaxial Dislocation (IAAD) Caused by Old Odontoid Fracture
Source: PubMed Central journal article supplement — Global Spine J. 2024 Nov 8;15(4):2340–7. doi: 10.1177/21925682241299711 (PMC11559942; doi:10.1177/21925682241299711), 2024-11-08
Supplement: sj-pdf-1-gsj-10.1177_21925682241299711.pdf [file sj-pdf-1-gsj-10.1177_21925682241299711.pdf]

**Supplemented Table** Detailed data of all 56 patients with IAAD caused by old odontoid fractures

| Case | Gender | Age (Years) | Cause of injury | Type of odontoid fracture* | Instability | Neurological deficit | Operative time (min) | Blood loss (ml) | Follow-up (month) | Bony fusion (month) | Complications                         | Pre-ADI | Post-ADI† | Pre-SAC | Post-SAC† | Pre-JOA | Post-JOA# | Pre-VAS | Post-VAS# | Pre-NDI | Post-NDI# |
|------|--------|-------------|-----------------|----------------------------|-------------|----------------------|----------------------|-----------------|-------------------|---------------------|---------------------------------------|---------|-----------|---------|-----------|---------|-----------|---------|-----------|---------|-----------|
| 1    | M      | 23          | FI              | Type II                    | Y           | Y                    | 155                  | 80              | 24                | 3                   | N                                     | 8.5     | 1.1       | 9.5     | 14.9      | 14      | 17        | 6       | 1         | 50      | 4         |
| 2    | M      | 32          | FI              | Type III                   | Y           | Y                    | 200                  | 90              | 30                | 6                   | N                                     | 10.1    | 2.8       | 10.1    | 18.0      | 12      | 16        | 4       | 0         | 56      | 8         |
| 3    | F      | 36          | MVA             | Type III                   | Y           | Y                    | 210                  | 55              | 35                | 6                   | N                                     | 7.8     | 0.5       | 11.0    | 17.9      | 13      | 17        | 5       | 0         | 40      | 6         |
| 4    | F      | 28          | MVA             | Type II                    | Y           | Y                    | 180                  | 80              | 24                | 6                   | N                                     | 8.1     | 1.0       | 8.8     | 15.4      | 13      | 17        | 4       | 0         | 30      | 6         |
| 5    | F      | 43          | MVA             | Type III                   | Y           | Y                    | 210                  | 90              | 30                | 6                   | Y (Screw misplacement)                | 7.5     | 2.0       | 9.5     | 16.0      | 15      | 17        | 3       | 0         | 18      | 0         |
| 6    | M      | 45          | SRI             | Type II                    | Y           | Y                    | 185                  | 110             | 24                | 6                   | N                                     | 9.0     | 1.4       | 10.2    | 17.0      | 12      | 16        | 3       | 0         | 36      | 2         |
| 7    | F      | 37          | FI              | Type II                    | Y           | Y                    | 220                  | 80              | 32                | 3                   | N                                     | 5.6     | 0.0       | 11.1    | 18.8      | 12      | 17        | 4       | 0         | 38      | 0         |
| 8    | M      | 52          | FI              | Type II                    | Y           | Y                    | 205                  | 100             | 24                | 6                   | N                                     | 6.8     | 0.0       | 7.9     | 15.8      | 10      | 16        | 5       | 0         | 64      | 18        |
| 9    | M      | 55          | MVA             | Type III                   | Y           | Y                    | 210                  | 205             | 25                | 9                   | N                                     | 7.6     | 1.3       | 9.3     | 15.5      | 14      | 17        | 3       | 0         | 36      | 6         |
| 10   | M      | 58          | FI              | Type III                   | Y           | Y                    | 200                  | 155             | 24                | 9                   | Y (Pulmonary infection)               | 11.2    | 2.2       | 8.1     | 14.9      | 11      | 16        | 4       | 0         | 42      | 0         |
| 11   | F      | 36          | FI              | Type II                    | Y           | Y                    | 185                  | 90              | 42                | 3                   | N                                     | 10.5    | 1.2       | 9.8     | 14.3      | 12      | 17        | 6       | 1         | 44      | 8         |
| 12   | M      | 26          | SRI             | Type III                   | Y           | Y                    | 180                  | 60              | 24                | 6                   | N                                     | 9.9     | 0.8       | 10.5    | 16.9      | 15      | 17        | 4       | 0         | 24      | 0         |
| 13   | F      | 33          | MVA             | Type III                   | Y           | Y                    | 210                  | 80              | 33                | 3                   | N                                     | 8.2     | 1.0       | 12.0    | 19.0      | 14      | 17        | 3       | 0         | 26      | 0         |
| 14   | F      | 45          | MVA             | Type II                    | Y           | Y                    | 185                  | 100             | 48                | 9                   | Y (Pharyngeal foreign body sensation) | 9.3     | 2.5       | 11.4    | 17.0      | 12      | 16        | 3       | 0         | 34      | 2         |
| 15   | M      | 48          | FI              | Type III                   | Y           | Y                    | 160                  | 80              | 55                | 9                   | N                                     | 10.2    | 1.7       | 8.9     | 13.0      | 14      | 17        | 4       | 0         | 24      | 0         |
| 16   | M      | 32          | FI              | Type III                   | Y           | Y                    | 180                  | 120             | 30                | 6                   | N                                     | 11.5    | 0.8       | 8.1     | 14.2      | 12      | 17        | 5       | 0         | 48      | 4         |
| 17   | M      | 46          | FI              | Type III                   | Y           | Y                    | 200                  | 115             | 33                | 9                   | N                                     | 10.6    | 2.6       | 10.5    | 15.9      | 15      | 17        | 4       | 0         | 20      | 0         |
| 18   | M      | 31          | MVA             | Type II                    | Y           | Y                    | 165                  | 55              | 51                | 3                   | Y (Pharyngeal foreign body sensation) | 8.4     | 0.0       | 8.9     | 15.0      | 11      | 16        | 4       | 0         | 56      | 6         |

|    |   |    |     |          |   |   |     |     |    |   |                                       |      |     |      |      |    |    |   |   |    |    |
|----|---|----|-----|----------|---|---|-----|-----|----|---|---------------------------------------|------|-----|------|------|----|----|---|---|----|----|
| 19 | F | 30 | MVA | Type II  | Y | Y | 210 | 60  | 48 | 3 | N                                     | 10.0 | 1.2 | 7.7  | 13.3 | 10 | 15 | 4 | 0 | 70 | 20 |
| 20 | F | 40 | SRI | Type II  | Y | Y | 175 | 55  | 42 | 6 | N                                     | 9.8  | 2.3 | 6.0  | 12.6 | 8  | 15 | 3 | 0 | 78 | 10 |
| 21 | F | 42 | MVA | Type II  | Y | Y | 155 | 80  | 24 | 9 | N                                     | 6.5  | 0.0 | 7.8  | 14.8 | 11 | 16 | 4 | 0 | 64 | 18 |
| 22 | M | 50 | MVA | Type III | Y | Y | 190 | 90  | 50 | 9 | N                                     | 7.7  | 1.1 | 7.1  | 13.6 | 9  | 14 | 3 | 0 | 72 | 12 |
| 23 | F | 43 | FI  | Type III | Y | Y | 185 | 110 | 30 | 6 | N                                     | 8.3  | 2.8 | 8.4  | 14.4 | 12 | 17 | 4 | 0 | 56 | 10 |
| 24 | F | 62 | FI  | Type III | Y | Y | 205 | 105 | 36 | 9 | Y (Pulmonary infection)               | 11.0 | 1.5 | 11.8 | 17.0 | 15 | 17 | 5 | 1 | 26 | 0  |
| 25 | M | 43 | SRI | Type II  | Y | Y | 200 | 95  | 42 | 6 | N                                     | 6.6  | 0.0 | 7.6  | 13.0 | 11 | 16 | 4 | 1 | 48 | 10 |
| 26 | F | 44 | FI  | Type III | Y | Y | 165 | 85  | 28 | 9 |                                       | 6.9  | 0.0 | 8.0  | 13.8 | 12 | 17 | 3 | 0 | 44 | 6  |
| 27 | F | 38 | MVA | Type III | Y | Y | 215 | 105 | 36 | 6 | Y (Screw misplacement)                | 7.5  | 0.6 | 7.6  | 14.0 | 8  | 14 | 4 | 0 | 74 | 18 |
| 28 | M | 36 | SRI | Type II  | Y | Y | 185 | 110 | 38 | 3 | N                                     | 9.8  | 1.4 | 8.6  | 14.2 | 12 | 17 | 4 | 0 | 48 | 10 |
| 29 | F | 46 | FI  | Type II  | Y | Y | 165 | 85  | 24 | 9 | N                                     | 10.7 | 1.9 | 7.1  | 13.8 | 11 | 15 | 5 | 1 | 54 | 10 |
| 30 | F | 42 | FI  | Type III | Y | Y | 205 | 155 | 26 | 6 | N                                     | 11.1 | 2.2 | 10.0 | 15.0 | 15 | 17 | 6 | 0 | 22 | 0  |
| 31 | M | 29 | MVA | Type II  | Y | Y | 155 | 110 | 33 | 6 | N                                     | 11.7 | 1.8 | 11.4 | 17.9 | 13 | 17 | 4 | 0 | 38 | 2  |
| 32 | F | 37 | FI  | Type III | Y | Y | 255 | 60  | 32 | 3 | N                                     | 8.5  | 0.5 | 10.8 | 16.3 | 12 | 17 | 3 | 0 | 42 | 10 |
| 33 | F | 44 | SRI | Type III | Y | Y | 180 | 100 | 40 | 6 | N                                     | 8.6  | 1.5 | 9.9  | 16.5 | 12 | 16 | 5 | 0 | 44 | 6  |
| 34 | M | 48 | FI  | Type II  | Y | Y | 150 | 80  | 24 | 6 | Y (Screw misplacement)                | 10.3 | 2.8 | 7.8  | 16.8 | 11 | 16 | 4 | 0 | 58 | 12 |
| 35 | F | 41 | MVA | Type II  | Y | Y | 200 | 55  | 31 | 6 | N                                     | 11.2 | 3.6 | 8.3  | 15.9 | 10 | 15 | 4 | 0 | 62 | 18 |
| 36 | F | 35 | MVA | Type III | Y | Y | 240 | 70  | 45 | 3 | N                                     | 8.5  | 1.6 | 7.5  | 15.7 | 10 | 15 | 5 | 1 | 66 | 14 |
| 37 | F | 33 | FI  | Type III | Y | Y | 250 | 85  | 50 | 3 | Y (Pharyngeal foreign body sensation) | 9.9  | 2.2 | 6.4  | 13.2 | 9  | 14 | 3 | 0 | 70 | 14 |
| 38 | M | 28 | FI  | Type II  | Y | Y | 300 | 60  | 60 | 6 | N                                     | 7.6  | 1.9 | 10.1 | 16.3 | 12 | 17 | 3 | 0 | 58 | 8  |
| 39 | F | 42 | MVA | Type III | Y | Y | 305 | 80  | 24 | 9 | N                                     | 4.8  | 0.8 | 9.2  | 17.3 | 12 | 17 | 2 | 0 | 52 | 12 |
| 40 | M | 54 | SRI | Type III | Y | Y | 260 | 100 | 28 | 9 | N                                     | 6.4  | 1.2 | 11.3 | 17.5 | 12 | 17 | 3 | 0 | 48 | 8  |
| 41 | M | 43 | FI  | Type II  | Y | Y | 205 | 90  | 30 | 6 | N                                     | 7.9  | 2.1 | 10.5 | 16.9 | 11 | 16 | 4 | 1 | 50 | 8  |

|    |   |    |     |          |   |   |     |     |    |   |                                             |      |     |      |      |    |    |   |   |    |    |
|----|---|----|-----|----------|---|---|-----|-----|----|---|---------------------------------------------|------|-----|------|------|----|----|---|---|----|----|
| 42 | M | 55 | FI  | Type II  | Y | Y | 185 | 85  | 24 | 6 | Y (Pharyngeal<br>foreign body<br>sensation) | 9.6  | 3.1 | 9.4  | 14.3 | 11 | 15 | 4 | 0 | 46 | 4  |
| 43 | F | 58 | MVA | Type II  | Y | Y | 190 | 65  | 27 | 6 | N                                           | 10.1 | 2.9 | 7.5  | 15.2 | 10 | 15 | 5 | 1 | 60 | 14 |
| 44 | F | 53 | SRI | Type III | Y | Y | 310 | 60  | 24 | 9 | N                                           | 9.3  | 1.4 | 8.8  | 15.5 | 11 | 15 | 2 | 0 | 50 | 10 |
| 45 | F | 32 | FI  | Type III | Y | Y | 230 | 55  | 32 | 3 | N                                           | 8.5  | 2.1 | 9.8  | 17.8 | 13 | 17 | 3 | 0 | 44 | 6  |
| 46 | M | 30 | FI  | Type III | Y | Y | 255 | 90  | 28 | 3 | N                                           | 5.4  | 0.5 | 11.2 | 15.6 | 14 | 17 | 2 | 0 | 20 | 0  |
| 47 | M | 39 | MVA | Type III | Y | Y | 210 | 100 | 42 | 3 | N                                           | 4.9  | 0.9 | 10.5 | 14.9 | 14 | 17 | 4 | 0 | 16 | 0  |
| 48 | F | 27 | FI  | Type II  | Y | Y | 215 | 150 | 39 | 3 | N                                           | 5.5  | 1.1 | 10.1 | 16.6 | 13 | 17 | 3 | 0 | 20 | 0  |
| 49 | M | 58 | FI  | Type III | Y | Y | 180 | 110 | 24 | 9 | N                                           | 10.4 | 3.1 | 6.9  | 14.2 | 9  | 14 | 4 | 0 | 30 | 2  |
| 50 | F | 32 | SRI | Type III | Y | Y | 245 | 100 | 50 | 3 | N                                           | 8.3  | 2.3 | 10.4 | 17.2 | 12 | 17 | 3 | 0 | 22 | 0  |
| 51 | M | 44 | FI  | Type II  | Y | Y | 225 | 60  | 33 | 3 | N                                           | 9.0  | 2.9 | 10.2 | 13.9 | 11 | 15 | 3 | 0 | 40 | 6  |
| 52 | F | 63 | FI  | Type III | Y | Y | 250 | 65  | 24 | 9 | N                                           | 10.2 | 3.3 | 6.9  | 13.2 | 9  | 14 | 2 | 0 | 52 | 4  |
| 53 | F | 60 | MVA | Type III | Y | Y | 200 | 70  | 24 | 6 | Y (Pharyngeal<br>foreign body<br>sensation) | 11.4 | 2.8 | 7.5  | 12.9 | 8  | 14 | 3 | 0 | 60 | 8  |
| 54 | M | 53 | FI  | Type II  | Y | Y | 150 | 70  | 36 | 6 | N                                           | 9.6  | 1.6 | 8.9  | 13.8 | 11 | 15 | 3 | 0 | 42 | 0  |
| 55 | M | 32 | FI  | Type III | Y | Y | 245 | 85  | 45 | 3 | N                                           | 7.7  | 2.7 | 9.9  | 16.8 | 12 | 17 | 3 | 0 | 38 | 6  |
| 56 | F | 48 | MVA | Type III | Y | Y | 210 | 100 | 35 | 6 | N                                           | 8.6  | 1.3 | 8.2  | 15.6 | 11 | 15 | 5 | 1 | 40 | 0  |

M, Male, F, Female; FI, Fall injury; SRI, Sports related injury; MVA, Motor vehicle accident; Y, Yes; N, No; ADI, atlantodental interval; SAC, space available for the spinal cord; JOA, Japanese Orthopaedic Association; VAS, visual analog scale; NDI, Neck Disability Index

\*Type of odontoid fracture according to the classification system of Anderson and D'Alonzo

†Data at one week after surgery

#Data from the final follow-up
